# Supplementary material
Source: PubMed Central journal article supplement (PMC4075598)

A

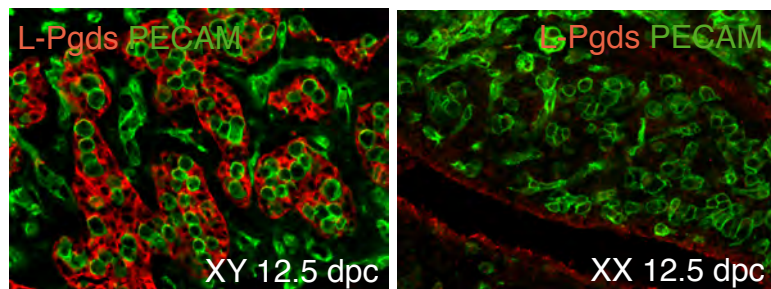

B

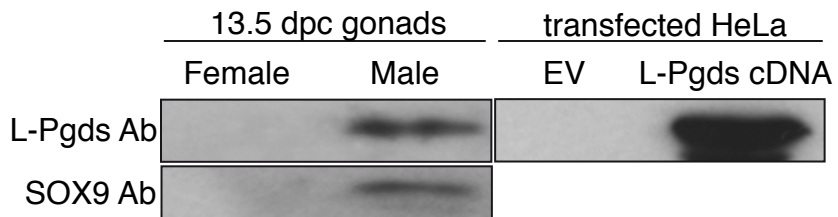

Supplement: supp_136.11.1813_032631-FigS1.pdf [file supp_136.11.1813_032631-FigS1.pdf]

**A**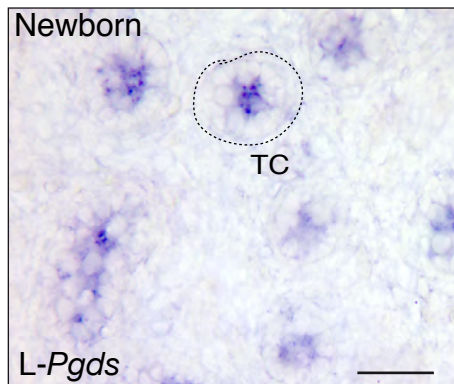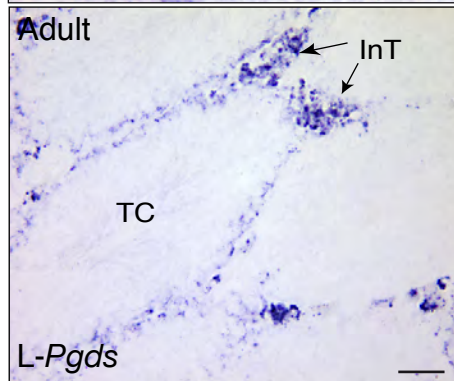**B**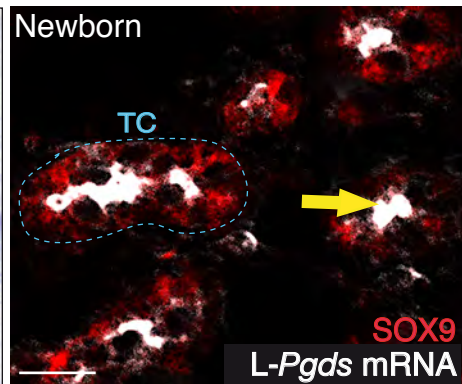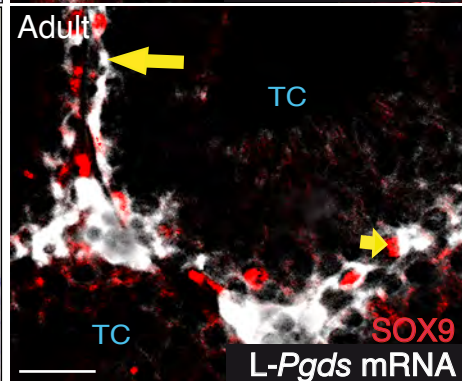

Supplement: supp_136.11.1813_032631-FigS2.pdf [file supp_136.11.1813_032631-FigS2.pdf]
